# Supplementary material for: Development of a mucoadhesive drug delivery system and its interaction with gastric cells
Source: publisher site journal article supplement (doi:10.3762/bjnano.16.28), 2025-03-13
Supplement: Additional file 2 [file 2190-4286-16-28-S2.pdf]

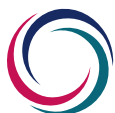

## Supporting Information

for

### **Development of a mucoadhesive drug delivery system and its interaction with gastric cells**

Ahmet Baki Sahin, Serdar Karakurt and Deniz Sezlev Bilecen

*Beilstein J. Nanotechnol.* **2025**, *16*, 371–384. [doi:10.3762/bjnano.16.28](https://doi.org/10.3762/bjnano.16.28)

### **Properties of FAM-labeled peptide**

## Properties of the FAM-labeled peptide

The mass spectrum of the FAM-labeled peptide that was used as a model drug molecule is provided in Figure S1. The emission spectrum ( $\lambda_{\text{ex}} = 485 \text{ nm}$ ) of the purchased FAM-labeled peptide is given in Figure S2.

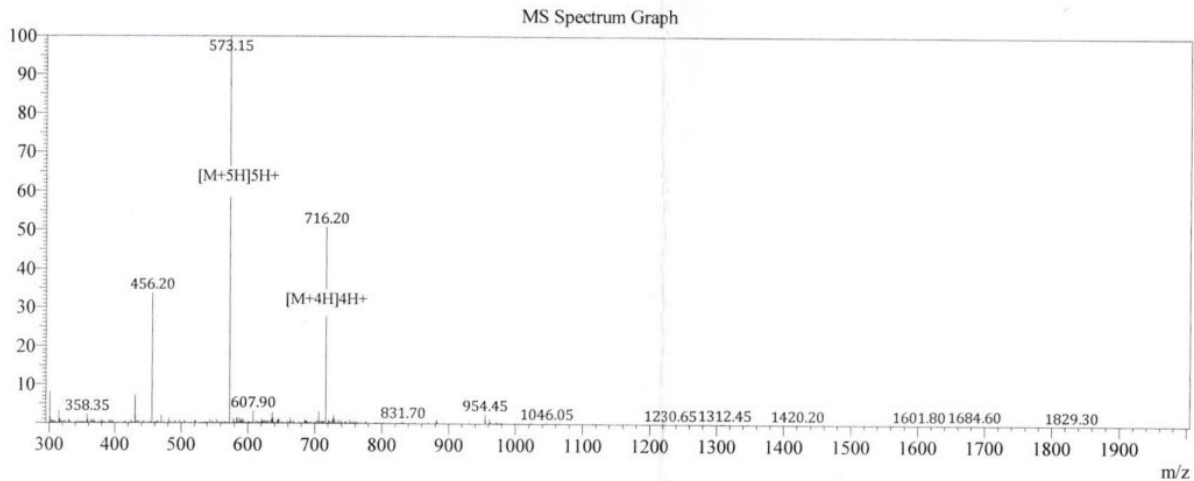

**Figure S1:** Mass spectrum of the FAM-labeled peptide (sequence: lauric acid–VVAGFSGGNCRGFRRRCFCT{K(5-FAM)}–NH<sub>2</sub>). The mass spectrum result of the model peptide is  $[M + 4H]^{4+}_{\text{calc}} = 716.34$ ,  $[M + 4H]^{4+}_{\text{obs}} = 716.20$ ;  $[M + 5H]^{5+}_{\text{calc}} = 573.07$ ,  $[M + 5H]^{5+}_{\text{obs}} = 573.15$ .

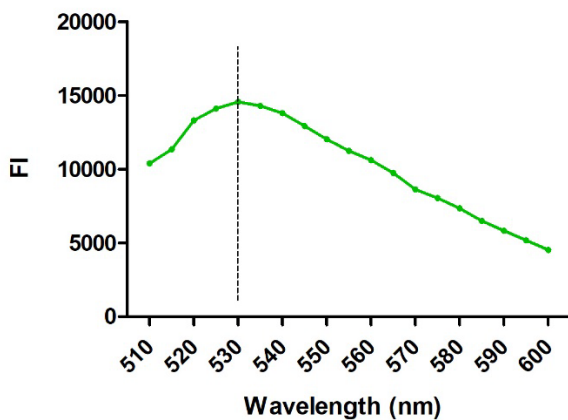

**Figure S2:** Emission spectrum of the FAM-labeled peptide,  $\lambda_{\text{ex}} = 485 \text{ nm}$ .
