# Supplementary material for: Development of a mucoadhesive drug delivery system and its interaction with gastric cells
Source: publisher site journal article supplement (doi:10.3762/bjnano.16.28), 2025-03-13
Supplement: Additional file 3 [file 2190-4286-16-28-S3.pdf]

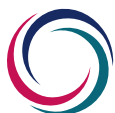

## Supporting Information

for

### **Development of a mucoadhesive drug delivery system and its interaction with gastric cells**

Ahmet Baki Sahin, Serdar Karakurt and Deniz Sezlev Bilecen

*Beilstein J. Nanotechnol.* **2025**, *16*, 371–384. [doi:10.3762/bjnano.16.28](https://doi.org/10.3762/bjnano.16.28)

### **Periodic acid–Schiff staining of cells**

### **Periodic acid–Schiff (PAS) staining of cells**

$6 \times 10^4$  cells were seeded on 24-well plates and incubated for two days, then fixed with 4% paraformaldehyde for 20 min. After washing with PBS, the cells were incubated with periodic acid (0.5% for 10 min), washed with PBS, and incubated with Schiff's reagent for 30 min. The cells were then washed with water, and images were taken under an inverted light microscope. The cells with purple-red-stained cytoplasm were counted as mucus-positive cells (Figure S1).

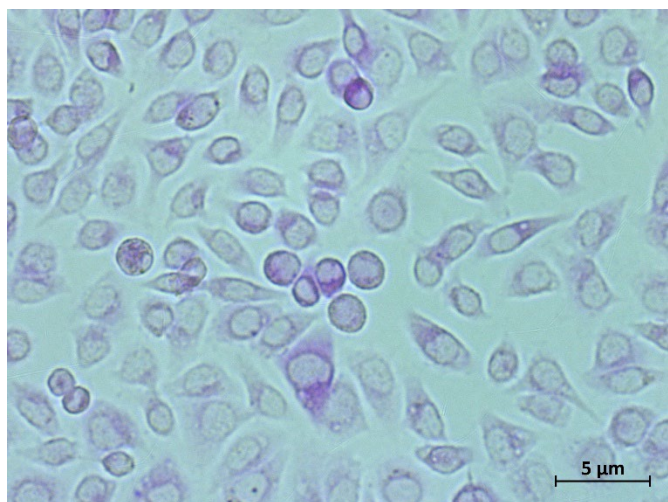

**Figure S1:** Light microscopy image of mucus-positive AGS cells.
